# Supplementary material
Source: PubMed Central journal article supplement (PMC6830892)
Supplement: Supplemental_Material.pdf [file Supplemental_Material.pdf]

Supplementary Data, Figure 1

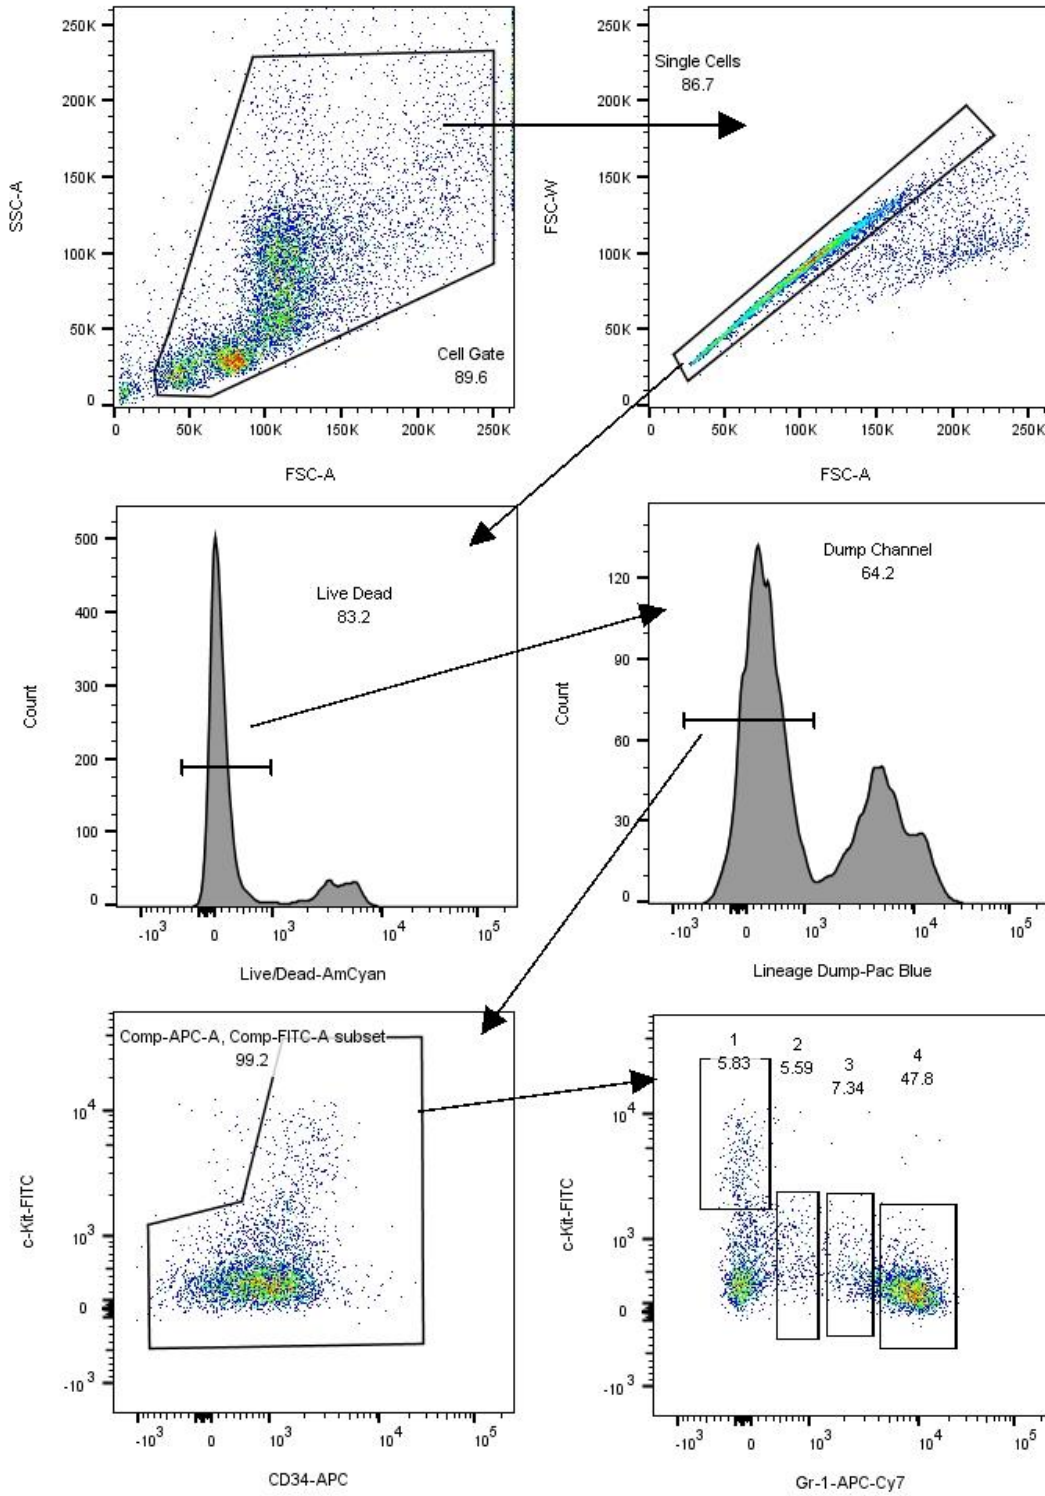

Supplementary Figure 1: Gating strategy for isolating maturing neutrophil subpopulations. Protocol was developed and described by Satake et al. (30)
